# Supplementary material
Source: PubMed Central journal article supplement (PMC6786902)
Supplement: NIHMS1531412-supplement-125_2019_4881_MOESM1_ESM.pdf [file NIHMS1531412-supplement-125_2019_4881_MOESM1_ESM.pdf]

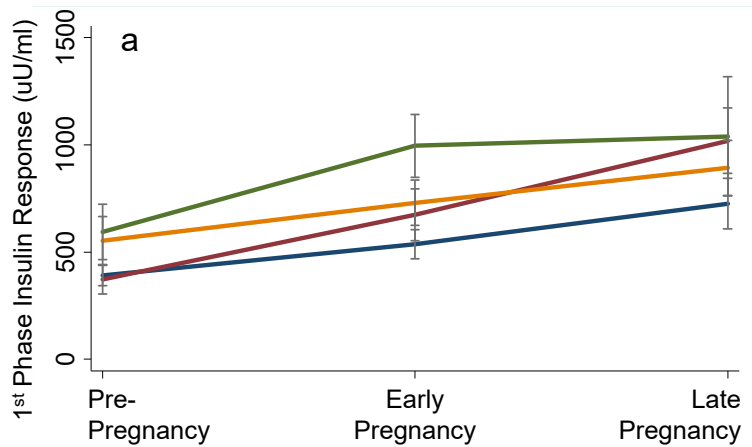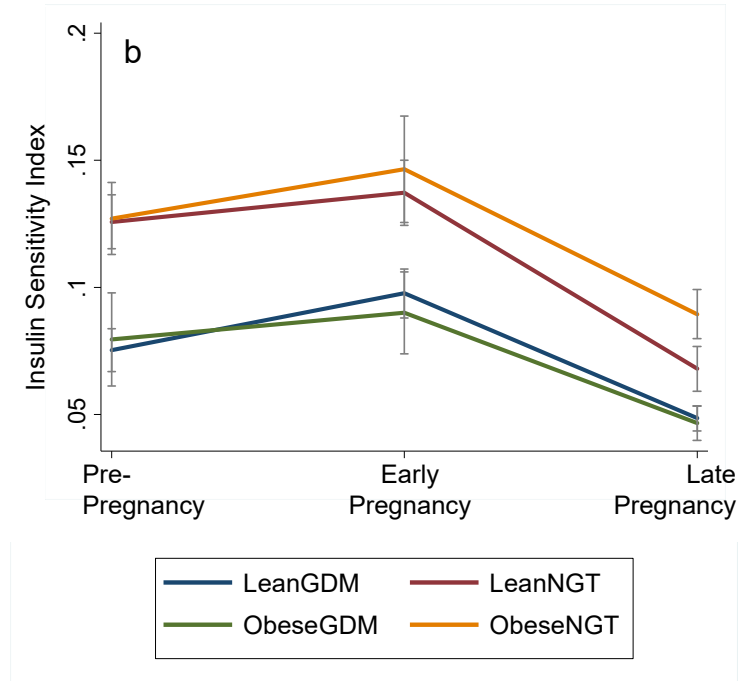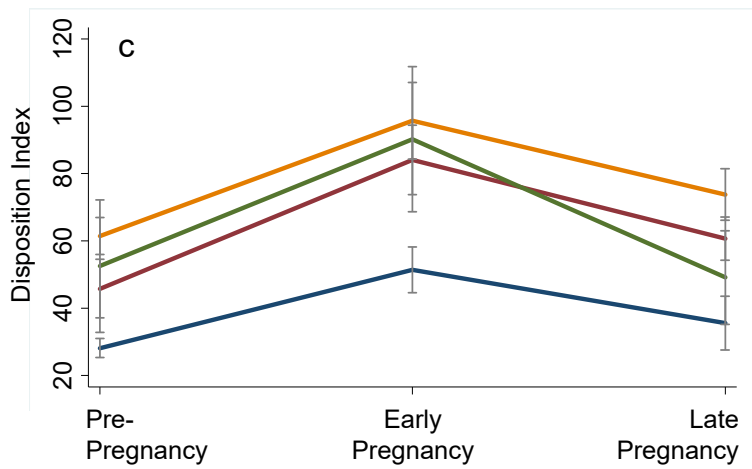

**ESM Figure 1. Changes in First Phase Insulin Response, Insulin Sensitivity Index, and Disposition Index by Obesity and GDM Status.** Mean first-phase insulin response (a), insulin sensitivity index (b) and DI (c) at the three study time points by obesity and GDM status. Error bars denote the SEM for each time point.
